# Supplementary material for: Tensile properties and in vitro degradation of P(TMC-co-LLA) elastomers
Source: Royal Society of Chemistry journal article supplement (doi:10.1039/c5tb00202h), 2015-01-01
Supplement: c5tb00202h1.pdf [file c5tb00202h1.pdf]

## Supplementary material

### Tensile properties and *in vitro* degradation of P(TMC-co-LLA) elastomers

Jorja Cork, Andrew K. Whittaker, Justin J. Cooper-White, Lisbeth Grøndahl

**Table S1.** Number average molecular weight and dispersity of solvent cast films during the *in vitro* degradation study

| Copolymer                                   | Property             | Time (days) |     |     |     |     |     |
|---------------------------------------------|----------------------|-------------|-----|-----|-----|-----|-----|
|                                             |                      | 0           | 34  | 99  | 128 | 169 | 230 |
| P(TMC <sub>21</sub> -co-LLA <sub>79</sub> ) | $\bar{M}_n$ (kg/mol) | 16          | 18  | 8   | 6   | 4   | 3   |
|                                             | $\mathcal{D}_M$      | 2.1         | 2.1 | 2.9 | 3.0 | 2.8 | 2.9 |
| P(TMC <sub>21</sub> -co-LLA <sub>79</sub> ) | $\bar{M}_n$ (kg/mol) | 36          | -   | 19  | 6   | 3   | 3   |
|                                             | $\mathcal{D}_M$      | 2.0         | -   | 2.2 | 4.2 | 3.3 | 2.8 |
| P(TMC <sub>30</sub> -co-LLA <sub>70</sub> ) | $\bar{M}_n$ (kg/mol) | 11          | 17  | 7   | 4   | 3   | 3   |
|                                             | $\mathcal{D}_M$      | 2.4         | 1.9 | 2.6 | 2.8 | 2.7 | 2.4 |
| P(TMC <sub>30</sub> -co-LLA <sub>70</sub> ) | $\bar{M}_n$ (kg/mol) | 34          | -   | 18  | 5   | 6   | -   |
|                                             | $\mathcal{D}_M$      | 1.8         | -   | 1.9 | 3.5 | 3.1 | -   |

(-) = not determined
